# Supplementary material for: COVID-19 illness in relation to sleep and burnout
Source: HighWire-hosted journal article supplement (doi:10.1136/bmjnph-2021-000228), 2021-03-22
Supplement: bmjnph-2021-000228supp001_data_supplement.pdf [file bmjnph-2021-000228supp001_data_supplement.pdf]

**Title:** Covid-19 illness in relation to sleep and burnout

Hyunju Kim PhD, Sheila Hegde MD, Christine LaFiura BA, Madhunika Raghavan MA, Eric Luong MPH, Susan Cheng MD, Casey M Rebholz PhD, Sara B Seidelmann MD PhD

Supplemental Table 1. Adjusted Odds Ratios (OR) and 95% Confidence Intervals (CI) for the association between Sleep and Duration and Severity of Covid-19 like illness (n=568)<sup>a</sup>

Supplemental Table 2. Adjusted Odds Ratios (OR) and 95% Confidence Intervals (CI) for the Association between Sleep and Covid-19 test (PCR or antibody)<sup>a</sup>

Supplemental Table 1. Adjusted Odds Ratios (OR) and 95% Confidence Intervals (CI) for the association between Sleep and Duration and Severity of Covid-19 like illness (n=568)<sup>a</sup>

|                                                                             | <b>&gt; 14 days of symptoms<sup>b</sup></b> |             |             | <b>Moderate to severe symptoms<sup>c</sup></b> |             |         |
|-----------------------------------------------------------------------------|---------------------------------------------|-------------|-------------|------------------------------------------------|-------------|---------|
|                                                                             | OR (95% CI)                                 | P-value     | P-trend     | OR (95% CI)                                    | P-value     | P-trend |
| <b>Number of sleeping hours at night</b>                                    | 0.92 (0.76, 1.12)                           | 0.42        | --          | <b>0.83 (0.70, 0.99)</b>                       | <b>0.03</b> | --      |
| <b>Number of daytime napping hours</b>                                      | 0.93 (0.82, 1.05)                           | 0.25        | --          | 1.06 (0.97, 1.17)                              | 0.21        | --      |
| <b>Sleep disturbance</b>                                                    |                                             |             |             |                                                |             |         |
| Difficulty sleeping at night ( <i>yes</i> )                                 | 1.13 (0.68, 1.88)                           | 0.63        | --          | 1.04 (0.65, 1.67)                              | 0.87        | --      |
| Often wake up at early hours and unable to get back to sleep ( <i>yes</i> ) | 0.98 (0.60, 1.60)                           | 0.93        | --          | 0.86 (0.54, 1.37)                              | 0.53        | --      |
| Sleeping pill use >3 times/wk ( <i>yes</i> )                                | 1.35 (0.59, 3.07)                           | 0.48        | --          | 1.28 (0.6, 2.72)                               | 0.52        | --      |
| <b>Self-reported sleep disturbance score</b>                                |                                             |             |             |                                                |             |         |
| No sleep problem                                                            |                                             |             |             |                                                |             |         |
| Self-report of having 1 sleep problem                                       | 0.90 (0.49, 1.67)                           | 0.74        | --          | 0.59 (0.32, 1.11)                              | 0.10        | --      |
| Self-report of having 2 sleep problems                                      | 1.21 (0.66, 2.22)                           | 0.54        | --          | 1.06 (0.6, 1.88)                               | 0.84        | --      |
| Self-report of having 3 sleep problems                                      | 1.05 (0.37, 2.94)                           | 0.93        | --          | 1.09 (0.44, 2.71)                              | 0.85        | --      |
| <b>Any sleep disturbance (≥1 sleep problem)</b>                             | 1.04 (0.66, 1.65)                           | 0.86        | --          | 0.84 (0.54, 1.29)                              | 0.43        | --      |
| <b>Frequency of self-reported burnout</b>                                   |                                             |             | <b>0.02</b> | <b>0.01</b>                                    |             |         |
| Never                                                                       |                                             |             |             |                                                |             |         |
| Rarely                                                                      | 0.93 (0.47, 1.82)                           | 0.83        | --          | 1.00 (0.55, 1.83)                              | 0.99        | --      |
| Weekly                                                                      | 1.35 (0.59, 3.06)                           | 0.47        | --          | 1.47 (0.69, 3.12)                              | 0.32        | --      |
| Every day                                                                   | <b>2.98 (1.10, 8.05)</b>                    | <b>0.03</b> | --          | <b>3.26 (1.25, 8.48)</b>                       | <b>0.02</b> | --      |

<sup>a</sup> adjusted for age, sex, race, country, specialty, presence of a medical condition, stress from work (adjusted only for sleep variables), frequency of contact with a Covid-19 patient at work, close exposure to a Covid-19 patient inside the workplace without PPE and close exposure outside of the workplace

<sup>b</sup> Participants reported the number of days they experienced symptoms of Covid-19. Asymptomatic individuals with a positive PCR or antibody test were considered to have 0 days of Covid-19 symptom duration.

<sup>c</sup> Moderate to severe severity was compared to very mild to mild severity. ‘Very mild’ severity was defined as asymptomatic or nearly asymptomatic. ‘Mild’ severity was defined as symptoms [fever <38°C (without treatment), with or without cough, no dyspnea, no gasping, no abnormal imaging findings]. ‘Moderate’ severity was defined as fever, respiratory symptoms, and/or imaging findings of pneumonia. ‘Severe’

severity was defined as meet any of the following: 1) respiratory distress, Respiratory Rate  $\geq 30$  times/min 2) low oxygen saturation (SpO<sub>2</sub>) <93% at rest 3) partial pressure of oxygen (PaO<sub>2</sub>)/ fraction of inspired oxygen (FiO<sub>2</sub>)  $\leq 300$  mm Hg.

Supplemental Table 2. Adjusted Odds Ratios (OR) and 95% Confidence Intervals (CI) for the Association between Sleep and Covid-19 test (PCR or antibody)<sup>a</sup>

|                                                                             | OR (95% CI)              |              |             |                          |              |             |                          |              |             |
|-----------------------------------------------------------------------------|--------------------------|--------------|-------------|--------------------------|--------------|-------------|--------------------------|--------------|-------------|
|                                                                             | Model 1 <sup>b</sup>     | P-value      | P-trend     | Model 2 <sup>c</sup>     | P-value      | P-trend     | Model 3 <sup>d</sup>     | P-value      | P-trend     |
| <b>Number of sleeping hours at night</b>                                    | 0.89 (0.80, 1.01)        | 0.08         | --          | 0.91 (0.81, 1.01)        | 0.09         | --          | 0.91 (0.81, 1.02)        | 0.12         | --          |
| <b>Number of daytime napping hours</b>                                      | 1.00 (0.93, 1.07)        | 0.96         | --          | 1.00 (0.93, 1.07)        | 0.99         | --          | 1.00 (0.93, 1.07)        | 0.98         | --          |
| <b>Sleep disturbance</b>                                                    |                          |              |             |                          |              |             |                          |              |             |
| Difficulty sleeping at night ( <i>yes</i> )                                 | 0.93 (0.67, 1.26)        | 0.63         | --          | 0.88 (0.64, 1.21)        | 0.43         | --          | 0.86 (0.62, 1.19)        | 0.36         | --          |
| Often wake up at early hours and unable to get back to sleep ( <i>yes</i> ) | 0.85 (0.63, 1.15)        | 0.30         | --          | 0.81 (0.59, 1.10)        | 0.17         | --          | 0.77 (0.56, 1.05)        | 0.10         | --          |
| Sleeping pill use >3 times/week ( <i>yes</i> )                              | 1.25 (0.75, 2.12)        | 0.39         | --          | 1.21 (0.72, 2.05)        | 0.47         | --          | 1.15 (0.68, 1.95)        | 0.60         | --          |
| <b>Self-reported sleep disturbance score</b>                                |                          |              |             |                          |              |             |                          |              |             |
| No sleep problem                                                            | Ref                      | --           | 0.95        | Ref                      | --           | 0.34        | Ref                      | --           | 0.24        |
| Self-report of having 1 sleep problem                                       | 0.81 (0.57, 1.14)        | 0.23         | --          | 0.78 (0.55, 1.10)        | 0.17         | --          | 0.75 (0.53, 1.07)        | 0.11         | --          |
| Self-report of having 2 sleep problems                                      | 0.70 (0.46, 1.07)        | 0.10         | --          | 0.65 (0.42, 1.00)        | 0.05         | --          | <b>0.63 (0.41, 0.97)</b> | <b>0.04</b>  | --          |
| Self-report of having 3 sleep problems                                      | 1.77 (0.94, 3.33)        | 0.07         | --          | 1.64 (0.87, 3.11)        | 0.12         | --          | 1.50 (0.79, 2.85)        | 0.21         | --          |
| <b>Any sleep disturbance (≥1 sleep problem)</b>                             | 0.84 (0.64, 1.09)        | 0.19         | --          | 0.79 (0.60, 1.04)        | 0.11         | --          | 0.76 (0.58, 1.01)        | 0.06         | --          |
| <b>Frequency of self-reported burnout</b>                                   |                          |              |             |                          |              |             |                          |              |             |
| Never                                                                       | Ref                      | --           | <b>0.02</b> | Ref                      | --           | <b>0.02</b> | Ref                      | --           | <b>0.04</b> |
| Rarely                                                                      | 1.46 (1.00, 2.12)        | 0.05         |             | 1.46 (1.00, 2.13)        | 0.05         |             | 1.45 (0.99, 2.10)        | 0.05         |             |
| Weekly                                                                      | 1.36 (0.85, 2.17)        | 0.19         |             | 1.36 (0.85, 2.17)        | 0.25         |             | 1.30 (0.82, 2.09)        | 0.32         |             |
| Every day                                                                   | <b>2.80 (1.45, 5.39)</b> | <b>0.009</b> |             | <b>2.71 (1.46, 5.43)</b> | <b>0.002</b> |             | <b>2.60 (1.34, 5.05)</b> | <b>0.005</b> |             |

<sup>a</sup> Covid-19 cases are defined as individuals with positive PCR or antibody test (N=298 cases and N=2316 controls).<sup>b</sup> Model 1 adjusted for age, sex, race, and country.<sup>c</sup> Model 2 additionally adjusted for specialty, presence of a medical condition, and stress from work (feeling burned out; only adjusted for sleep habits).<sup>d</sup> Model 3 additionally adjusted for frequency of contact with a Covid-19 patient at work, close exposure to a Covid-19 patient inside the workplace without PPE and close exposure outside of the workplace.

Bold font denotes statistically significant associations.
